# Supplementary material for: DNA base-pair flipping with fluorescent perylenediimide pincers
Source: Royal Society of Chemistry journal article supplement (doi:10.1039/c0pp00044b), 2010-04-30
Supplement: c0pp00044b.pdf [file c0pp00044b.pdf]

Supporting Information for:

**DNA Base-Pair Flipping with Fluorescent Perylenediimide Pincers**

Tarek A. Zeidan, Mahesh Hariharan, Karsten Siegmund, and Frederick D. Lewis\*

Department of Chemistry, Northwestern University, Evanston, Illinois 60208-3113

Table containing MALDI data (Table S1), UV-Vis melting curves of **PP**, **G1**, **GA** and **G2** (Figure S1a), UV-Vis melting curves of **A1**, **A2**, **A3** and **A4** (Figure S1b), Temperature dependence of the intensity of the long-wavelength CD band for conjugates of **PP**, **A1-4** (Figure S2), Temperature dependence of the excimer fluorescence intensity for conjugates **PP**, **A1-4** (Figure S3).

**Table S1.** m/z values for oligonucleotides determined by MALD-TOF mass spectrometry.

|           | <b>m/z Calculated</b> | <b>m/z Determined</b> |
|-----------|-----------------------|-----------------------|
| <b>PP</b> | 6171.46               | 6177.30               |
| <b>A1</b> | 6788.86               | 6789.30               |
| <b>G1</b> | 6789.85               | 6790.51               |
| <b>A2</b> | 7406.26               | 7412.40               |
| <b>GA</b> | 7407.25               | 7409.88               |
| <b>G2</b> | 7408.24               | 7411.21               |
| <b>A3</b> | 8023.66               | 8030.70               |
| <b>A4</b> | 8641.06               | 8644.20               |

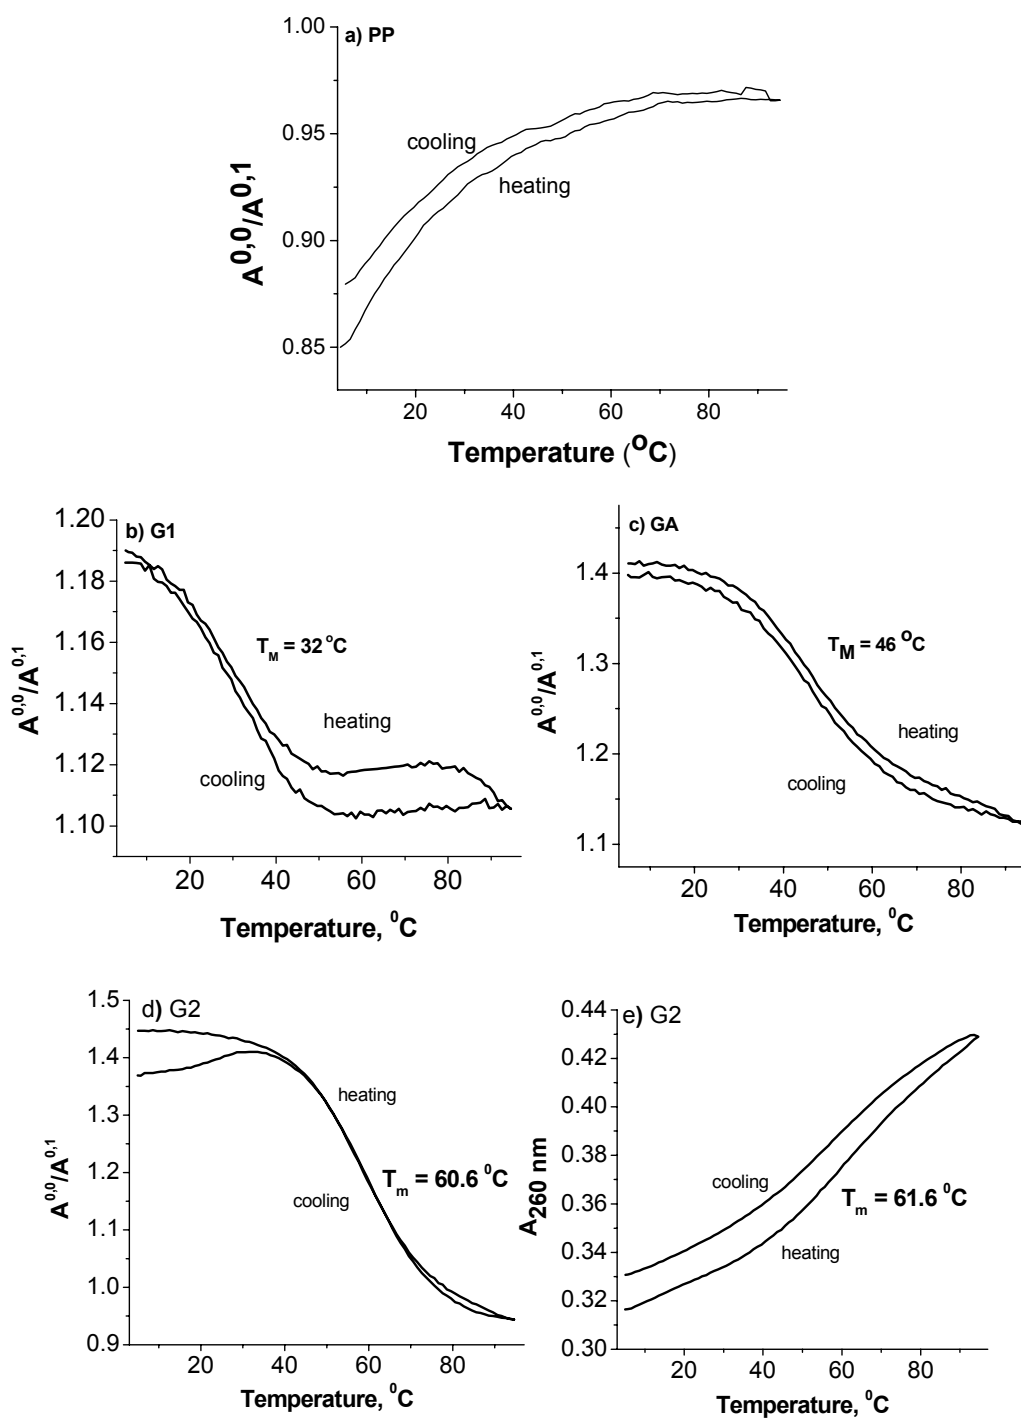

**Figure S1a.** UV/Vis melting curves monitored at the ratio  $A^{0,0}/A^{0,1}$  for the PDI conjugate a) **PP**; b) **G1**; c) **GA** and d) **G2** in TE buffer pH = 7.2 (20 mM Tris, 2 mM EDTA) and NaCl (100 mM) and e) as monitored heating at 260 nm **G2** under similar conditions.

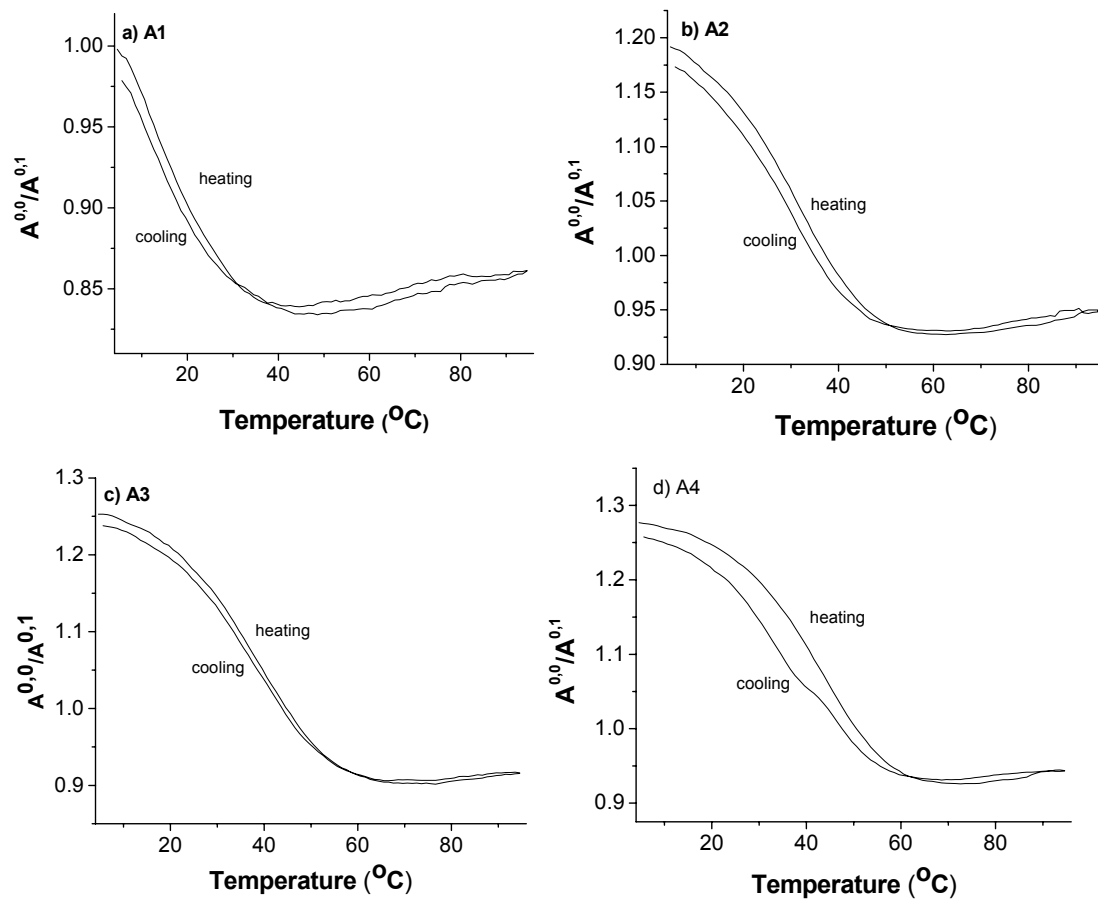

**Figure S1b.** UV/Vis melting curves monitored at the ratio  $A^{0.0}/A^{0.1}$  for the PDI conjugate a) A1; b) A2; c) A3 and d) A4 in TE buffer pH = 7.2 (20 mM Tris, 2 mM EDTA) and NaCl (100 mM).

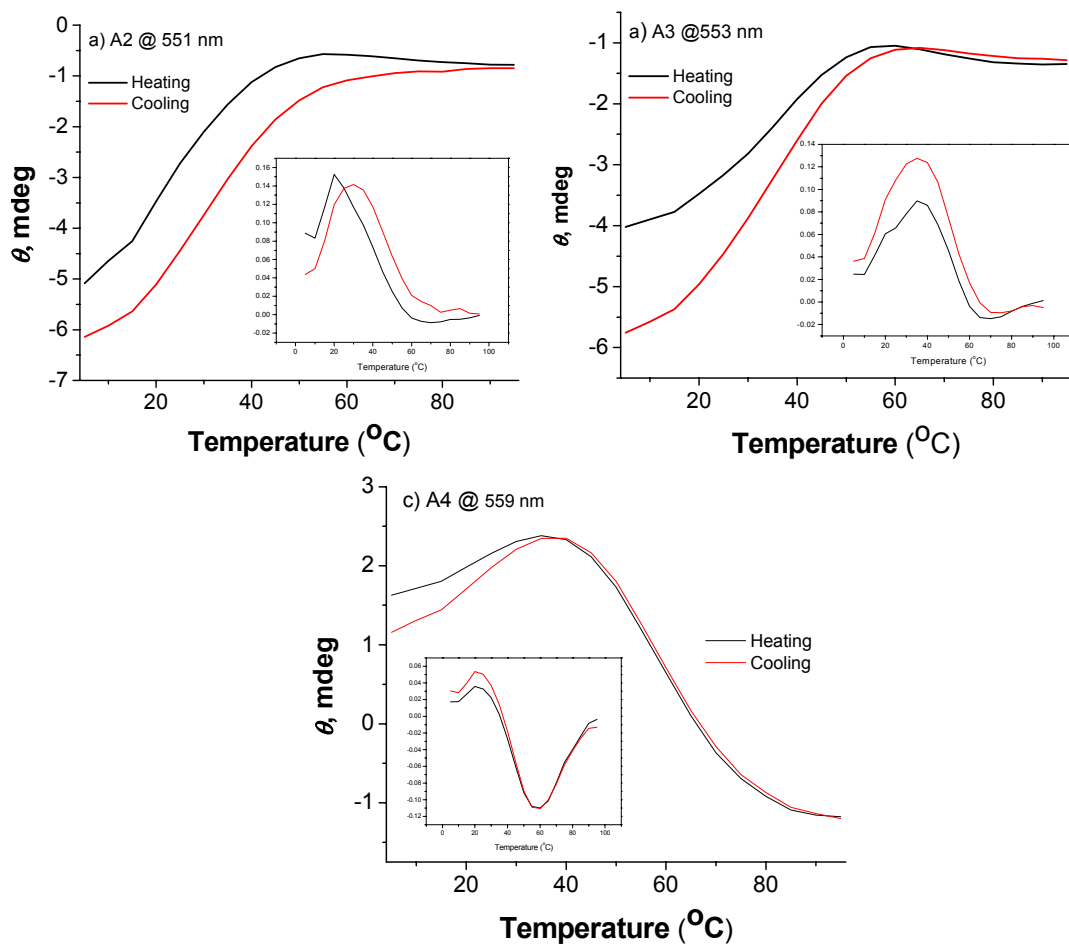

**Figure S2.** Temperature dependence of the intensity of the long-wavelength CD band for conjugates a) **A2**, b) **A3** and c) **A4** in TE buffer pH = 7.2 (20 mM Tris, 2 mM EDTA) and NaCl (100 mM). Derivative curves are shown as insets.

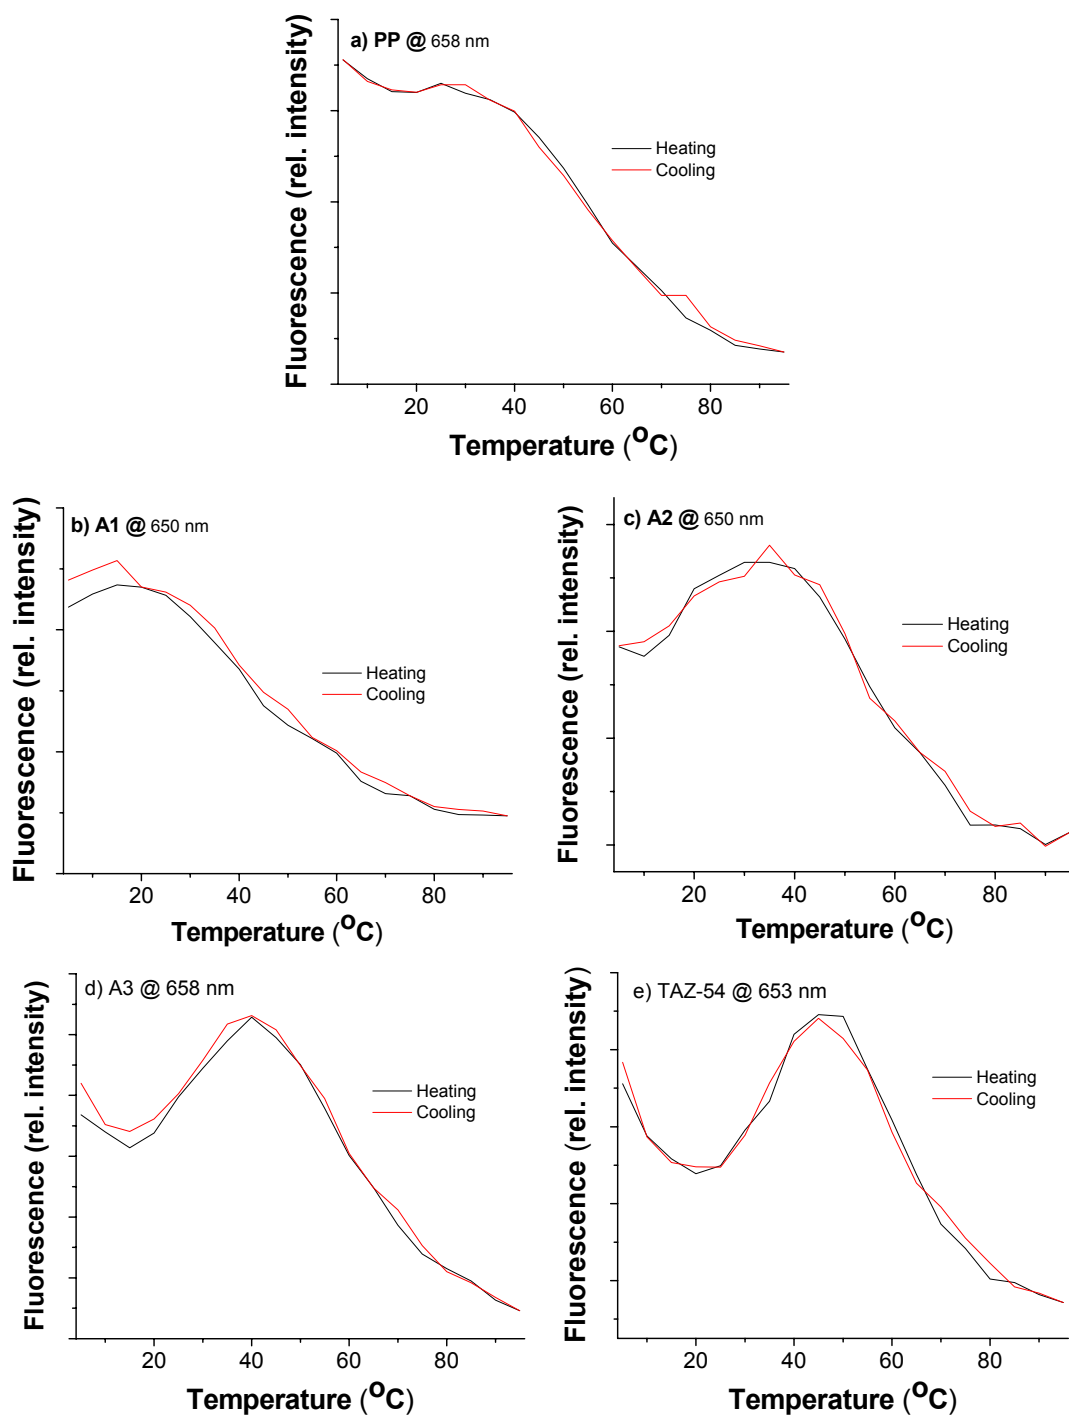

**Figure S3.** Temperature dependence of the excimer fluorescence intensity for conjugates a) PP; b) A1; c) A2; d) A3 and d) A4 in TE buffer pH = 7.2 (20 mM Tris, 2 mM EDTA) and NaCl (100 mM).
